# Supplementary material for: Systematic comparison of monoclonal versus polyclonal antibodies for mapping histone modifications by ChIP-seq
Source: PubMed Central journal article supplement (PMC5097419; doi:10.1186/s13072-016-0100-6), 2016-11-04
Supplement: 13072_2016_100_MOESM2_ESM.pdf [file 13072_2016_100_MOESM2_ESM.pdf]

**Table S1.** Datasets summary.**A.**

| Cell Type        | Antibody                 | Replicate              | Reads       | Pairs      |
|------------------|--------------------------|------------------------|-------------|------------|
| GM12878          | H3K4me1                  | Monoclonal Rep 1       | 83,100,486  | 41,550,243 |
|                  |                          | Monoclonal Rep 2       | 99,255,196  | 49,627,598 |
|                  | H3K4me3                  | Monoclonal Lot 8 Rep 1 | 99,255,196  | 78,227,985 |
|                  |                          | Monoclonal Lot 8 Rep 2 | 156,455,970 | 42,980,622 |
|                  |                          | Monoclonal Lot 9 Rep 1 | 85,961,244  | 33,912,720 |
|                  |                          | Monoclonal Lot 9 Rep 2 | 67,825,440  | 36,033,346 |
|                  | H3K9me3                  | Monoclonal Rep 1       | 143,527,964 | 71,763,982 |
|                  |                          | Monoclonal Rep 2       | 66,206,100  | 33,103,050 |
|                  | H3K27ac                  | Monoclonal Rep 1       | 146,244,844 | 73,122,422 |
|                  |                          | Monoclonal Rep 2       | 156,042,348 | 78,021,174 |
|                  | H3K27me3                 | Monoclonal Rep 1       | 157,892,610 | 78,946,305 |
|                  |                          | Monoclonal Rep 2       | 152,454,660 | 76,227,330 |
| HeLa             | H3K27ac                  | Monoclonal Rep 1       | 17,340,796  | 8,670,398  |
|                  |                          | Monoclonal Rep 2       | 16,389,304  | 8,194,652  |
|                  |                          | Polyclonal Rep 2       | 13,155,478  | 6,577,739  |
| K562             | H3K4me1                  | Monoclonal Rep 1       | 44,707,286  | 22,353,643 |
|                  |                          | Monoclonal Rep 2       | 19,370,594  | 9,685,297  |
|                  |                          | Polyclonal Rep 1       | 46,708,750  | 23,354,375 |
|                  |                          | Polyclonal Rep 2       | 77,858,414  | 38,929,207 |
|                  | H3K4me3 – lot comparison | Monoclonal Lot 8 Rep 1 | 83,285,982  | 41,642,991 |
|                  |                          | Monoclonal Lot 8 Rep 2 | 69,829,160  | 34,914,580 |
|                  |                          | Monoclonal Lot 9 Rep 1 | 73,635,980  | 36,817,990 |
|                  |                          | Monoclonal Lot 9 Rep 2 | 68,671,138  | 34,335,569 |
|                  | H3K4me3                  | Monoclonal Rep 1       | 10,769,082  | 5,384,541  |
|                  |                          | Monoclonal Rep 2       | 14,706,444  | 7,353,222  |
|                  |                          | Monoclonal Rep 2       | 14,864,810  | 7,432,405  |
|                  |                          | Monoclonal Rep 4       | 11,230,992  | 5,615,496  |
|                  |                          | Polyclonal Rep 1       | 13,184,088  | 6,592,044  |
|                  |                          | Polyclonal Rep 2       | 10,007,054  | 5,003,527  |
|                  |                          | Polyclonal Rep 3       | 11,968,378  | 5,984,189  |
|                  |                          | Polyclonal Rep 4       | 25,205,992  | 12,602,996 |
|                  | H3K9me3                  | Monoclonal Rep 1       | 75,625,321  | 37,812,661 |
|                  |                          | Monoclonal Rep 2       | 37,480,051  | 18,740,026 |
|                  |                          | Monoclonal Rep 2       | 45,075,156  | 22,537,578 |
|                  | H3K27ac                  | Monoclonal Rep 1       | 42,775,420  | 21,387,710 |
| Monoclonal Rep 2 |                          | 72,589,124             | 36,294,562  |            |
| Polyclonal Rep 1 |                          | 60,003,204             | 30,001,602  |            |
| Polyclonal Rep 2 |                          | 28,926,788             | 14,463,394  |            |

|     |          |                        |             |            |
|-----|----------|------------------------|-------------|------------|
|     | H3K27me3 | Monoclonal Rep 1       | 19,964,374  | 9,982,187  |
|     |          | Monoclonal Rep 2       | 24,909,516  | 12,454,758 |
|     |          | Monoclonal Rep 2       | 31,796,524  | 15,898,262 |
|     |          | Monoclonal Rep 4       | 25,983,780  | 12,991,890 |
|     |          | Polyclonal Rep 1       | 22,909,534  | 11,454,767 |
|     |          | Polyclonal Rep 2       | 28,428,020  | 14,214,010 |
|     |          | Polyclonal Rep 3       | 19,843,850  | 9,921,925  |
|     |          | Polyclonal Rep 4       | 37,134,412  | 18,567,206 |
|     | WCE      | Rep 1                  | 15,726,808  | 7,863,404  |
| mES | H3K4me1  | Monoclonal Rep 1       | 76,330,698  | 38,165,349 |
|     |          | Monoclonal Rep 2       | 98,191,020  | 49,095,510 |
|     | H3K4me3  | Monoclonal Lot 8 Rep 1 | 81,525,630  | 40,762,815 |
|     |          | Monoclonal Lot 8 Rep 2 | 80,975,708  | 40,487,854 |
|     |          | Monoclonal Lot 9 Rep 1 | 72,554,992  | 36,277,496 |
|     |          | Monoclonal Lot 9 Rep 2 | 73,758,624  | 36,879,312 |
|     | H3K27ac  | Monoclonal Rep 1       | 161,354,476 | 80,677,238 |
|     |          | Monoclonal Rep 2       | 161,371,680 | 80,685,840 |
|     | H3K27me3 | Monoclonal Rep 1       | 75,925,468  | 37,962,734 |
|     |          | Monoclonal Rep 2       | 164,450,620 | 82,225,310 |

## B.

|      |          | <b>Average Reads<br/>After<br/>Downsampling</b> | <b>Average Pairs<br/>After<br/>Downsampling</b> | <b>Pairs in Merged<br/>Dataset</b> |
|------|----------|-------------------------------------------------|-------------------------------------------------|------------------------------------|
| K562 | H3K27ac  | 25,808,498                                      | 12,904,249                                      | 25,808,498                         |
|      | H3K27me3 | 18,616,216                                      | 9,308,108                                       | 27,924,324                         |
|      | H3K4me1  | 35,539,733                                      | 17,769,867                                      | 35,539,733                         |
|      | H3K4me3  | 9,204,667                                       | 4,602,334                                       | 18,409,335                         |
|      | H3K9me3  | 28,479,015                                      | 14,239,507                                      | 28,479,015                         |
